# Supplementary material for: Identification of potential novel proteomic markers of Leishmania spp.-derived exosomes
Source: PubMed Central journal article supplement (PMC10910114; doi:10.3389/fcimb.2024.1354636), 2024-02-19
Supplement: Presentation_1.pdf [file Presentation_1.pdf]

## Supplementary Material

### Supplementary Figures

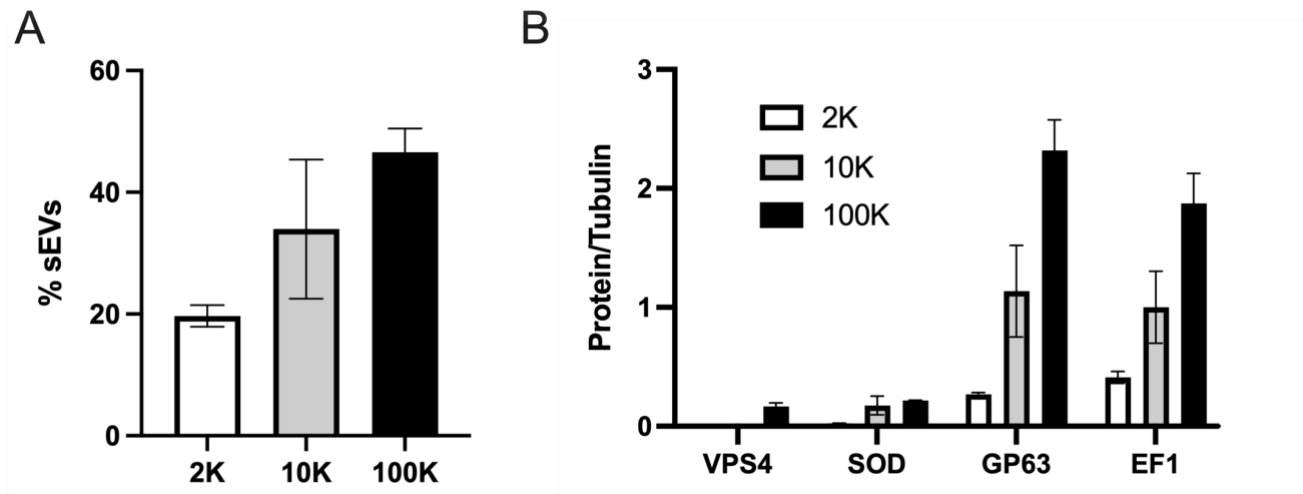

**Supplementary Figure 1. Relative content of probable exosomes and of exosomal proteins identified in fractions of *Leishmania major*-derived extracellular vesicles.** (A) Size distribution and concentration of extracellular vesicle populations were determined with NTA using triplicates for each fraction ( $n=3$ ). Small EVs (sEVs) are defined as EVs with a diameter inferior to 150 nm (instrumental error  $\pm 50$  nm). (B) The protein content of *Leishmania major*-derived EVs was catalogued by mass spectrometry (*L. major* database) using triplicates for each fraction ( $n=3$ ) and analyzed using Mascot followed by Scaffold Software. Peptide counts for canonical EV proteins were normalized to peptide counts for tubulin.

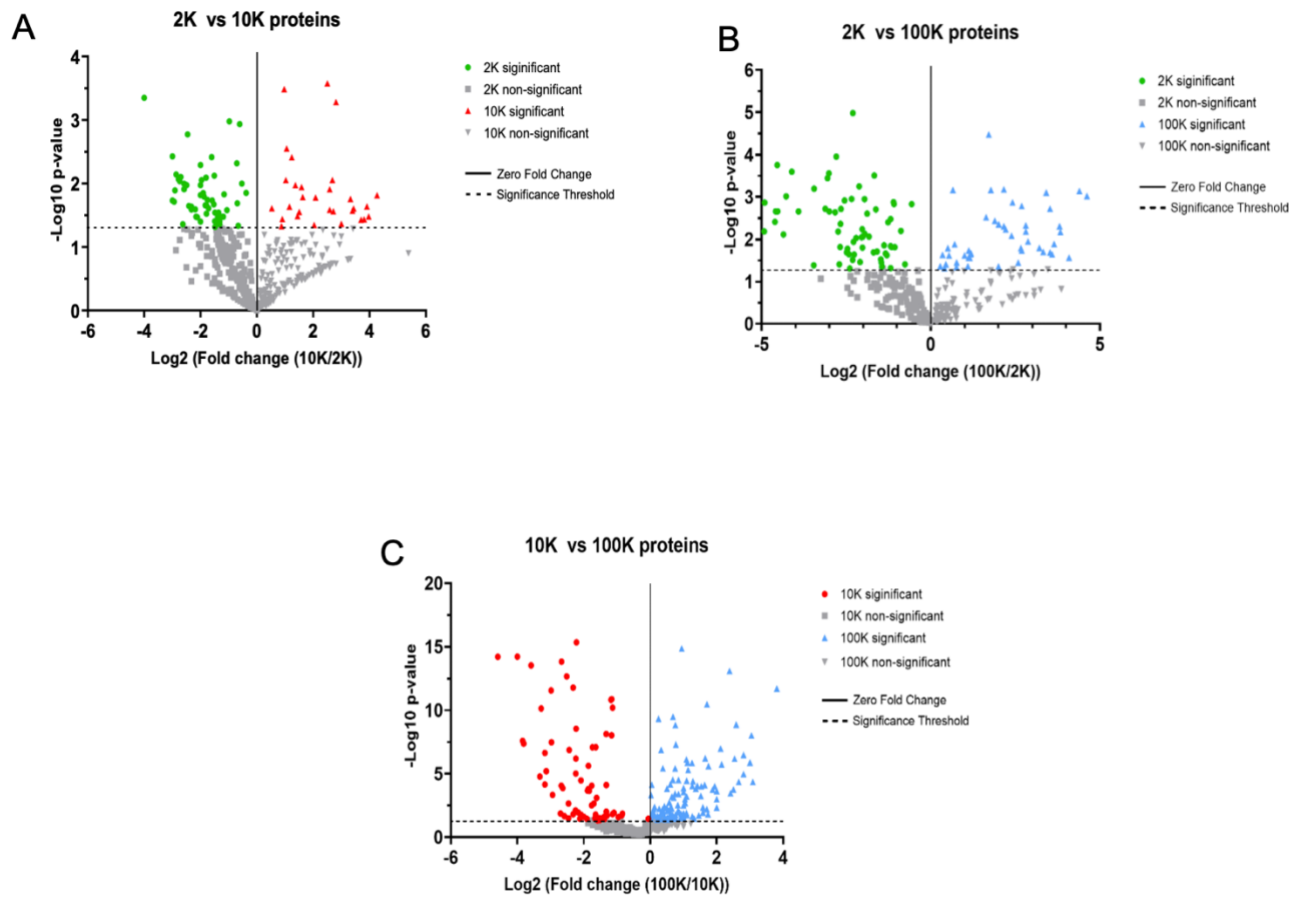

**Supplementary Figure 2. Comparative volcano plot of proteins identified in fractions of *Leishmania major*-derived extracellular vesicles.** The protein content of *Leishmania major*-derived EVs was catalogued by mass spectrometry (*L. major* database) using triplicates for each fraction ( $n=3$ ) and analyzed using Mascot followed by Scaffold Software. Quantitative analysis was performed using 2-way ANOVA and plotted according to fold change and statistical significance. Volcano plots represent the expression profiles of proteins identified in the (A) 2K vs. 10K fractions, (B) 2K vs. 100K fractions, and (C) 10K vs. 100K fractions. Coloured dots indicate statistically significant differences in expression ( $p<0.05$ ) between the groups.

## Supplementary Tables

|                                           | 2K       |         |            | 10K      |         |            | 100K     |         |            |
|-------------------------------------------|----------|---------|------------|----------|---------|------------|----------|---------|------------|
|                                           | N° Genes | % Genes | % Function | N° Genes | % Genes | % Function | N° Genes | % Genes | % Function |
| <b>Response to stimulus (GO:0050896)</b>  | 12       | 3.90%   | 3.90%      | 19       | 4.80%   | 4.60%      | 16       | 5.40%   | 4.90%      |
| <b>Signaling (GO:0023052)</b>             | 5        | 1.60%   | 1.60%      | 10       | 2.50%   | 2.40%      | 9        | 3.00%   | 2.80%      |
| <b>Cellular process (GO:0009987)</b>      | 144      | 47.20%  | 47.40%     | 192      | 48.40%  | 46.00%     | 146      | 49.20%  | 45.10%     |
| <b>Metabolic process (GO:0008152)</b>     | 87       | 28.50%  | 28.60%     | 121      | 30.50%  | 29.00%     | 87       | 29.30%  | 26.90%     |
| <b>Locomotion (GO:0040011)</b>            | 3        | 1.00%   | 1.00%      | 1        | 0.30%   | 0.20%      | 0        | 0.00%   | 0.00%      |
| <b>Biological regulation (GO:0065007)</b> | 24       | 7.90%   | 7.90%      | 34       | 8.60%   | 8.20%      | 25       | 8.40%   | 7.70%      |
| <b>Localization (GO:0051179)</b>          | 29       | 9.50%   | 9.50%      | 40       | 10.10%  | 9.60%      | 41       | 13.80%  | 12.70%     |

**Supplementary Table 1. Classification of total proteins detected in fractions of *Leishmania major*-derived extracellular vesicles according to Biological Process Gene Ontology Annotation.** Gene Ontology analysis was performed on LC-MS/MS proteomic datasets (*L. major* database) of all identified proteins in 2K, 10K and 100K fractions of EVs derived from *L. major*. PANTHER database (pantherdb.org) was used to annotate protein sets according to biological processes, providing the number of genes associated to diverse functions (N° Genes), the percentage of total genes associated with each function (% Genes), and the percentage of the total function that is covered by the protein list (% Function)

|                                                    | 2K       |         |            | 10K      |         |            | 100K     |         |            |
|----------------------------------------------------|----------|---------|------------|----------|---------|------------|----------|---------|------------|
|                                                    | N° Genes | % Genes | % Function | N° Genes | % Genes | % Function | N° Genes | % Genes | % Function |
| <b>Translation regulator activity (GO:0045182)</b> | 5        | 1.60%   | 2.30%      | 8        | 2.00%   | 2.90%      | 4        | 1.30%   | 1.90%      |
| <b>Binding (GO:0005488)</b>                        | 78       | 25.60%  | 36.10%     | 92       | 23.20%  | 33.00%     | 62       | 20.90%  | 29.00%     |
| <b>Structural molecule activity (GO:0005198)</b>   | 13       | 4.30%   | 6.00%      | 12       | 3.00%   | 4.30%      | 8        | 2.70%   | 3.70%      |
| <b>Molecular function regulator (GO:0098772)</b>   | 1        | 0.30%   | 0.50%      | 4        | 1.00%   | 1.40%      | 4        | 1.30%   | 1.90%      |
| <b>Catalytic activity (GO:0003824)</b>             | 110      | 36.10%  | 50.90%     | 151      | 38.00%  | 54.10%     | 121      | 40.70%  | 56.50%     |
| <b>Transporter activity (GO:0005215)</b>           | 9        | 3.00%   | 4.20%      | 12       | 3.00%   | 4.30%      | 15       | 5.10%   | 7.00%      |

**Supplementary Table 2. Classification of total proteins detected in fractions of *Leishmania major*-derived extracellular vesicles according to Molecular Function Gene Ontology Annotation.** Gene Ontology analysis was performed on LC-MS/MS proteomic datasets (*L. major* database) of all identified proteins in 2K, 10K and 100K fractions of EVs derived from *L. major*. PANTHER database (pantherdb.org) was used to annotate protein sets according to molecular functions, providing the number of genes associated to diverse functions (N° Genes), the percentage of total genes associated with each function (% Genes), and the percentage of the total function that is covered by the protein list (% Function)

|                                                                          | 2K       |         |            | 10K      |         |            | 100K     |         |            |
|--------------------------------------------------------------------------|----------|---------|------------|----------|---------|------------|----------|---------|------------|
|                                                                          | N° Genes | % Genes | % Function | N° Genes | % Genes | % Function | N° Genes | % Genes | % Function |
| <b>Mitochondrion (GO:0005739)</b>                                        | 16       | 29.60%  | 26.70%     | 10       | 15.90%  | 14.10%     | 4        | 7.00%   | 6.30%      |
| <b>Vacuole (GO:0005773)</b>                                              | 16       | 29.60%  | 26.70%     | 19       | 30.20%  | 26.80%     | 23       | 40.40%  | 35.90%     |
| <b>Microbody (GO:0042579)</b>                                            | 1        | 1.90%   | 1.70%      | 1        | 1.60%   | 1.40%      | 1        | 1.80%   | 1.60%      |
| <b>Endoplasmic reticulum (GO:0005783)</b>                                | 4        | 7.40%   | 6.70%      | 7        | 11.10%  | 9.90%      | 6        | 10.50%  | 9.40%      |
| <b>Golgi apparatus (GO:0005794)</b>                                      | 3        | 5.60%   | 5.00%      | 4        | 6.30%   | 5.60%      | 3        | 5.30%   | 4.70%      |
| <b>Endoplasmic reticulum-Golgi intermediate compartment (GO:0005793)</b> | 1        | 1.90%   | 1.70%      | 1        | 1.60%   | 1.40%      | 1        | 1.80%   | 1.60%      |
| <b>Nucleus (GO:0005634)</b>                                              | 19       | 35.20%  | 31.70%     | 29       | 46.00%  | 40.80%     | 26       | 45.60%  | 40.60%     |

**Supplementary Table 3. Classification of total proteins detected in fractions of *Leishmania major*-derived extracellular vesicles according to Cellular Component Gene Ontology Annotation.** Gene Ontology analysis was performed on LC-MS/MS proteomic datasets (*L. major* database) of all identified proteins in 2K, 10K and 100K fractions of EVs derived from *L. major*. PANTHER database (pantherdb.org) was used to annotate protein sets according to cellular components (Level 3 – Membrane bound organelle), providing the number of genes associated to diverse cellular components (N° Genes), the percentage of total genes associated with each cellular component (% Genes), and the percentage of the total cellular component that is covered by the protein list (% Function)

| Protein Name                    | Accession N° (UniProt) | Molecular Weight | 2K Average Peptide Count | 10K Average Peptide Count | 100K Average Peptide Count |
|---------------------------------|------------------------|------------------|--------------------------|---------------------------|----------------------------|
| GP63, leishmanolysin            | Q4QHH1_LEIMA           | 64 kDa           | 68.7 ± 1.2               | 127.6 ± 15.4              | 151.3 ± 19.4               |
| Elongation factor 1-alpha       | Q4QEI9_LEIMA           | 49 kDa           | 104.7 ± 6.6              | 116.3 ± 16.2              | 119.3 ± 5.2                |
| Enolase                         | Q4QFL8_LEIMA           | 46 kDa           | 14.3 ± 2.7               | 44.3 ± 5.5                | 57.6 ± 5.5                 |
| Heat shock protein 83-1         | E9AHM8_LEIIN           | 79 kDa           | 57.7 ± 3.7               | 78.0 ± 16.4               | 63.6 ± 7.4                 |
| Tryparedoxin                    | E9ADX4_LEIMA           | 17 kDa           | 1.3 ± 1.1                | 4.6 ± 2.0                 | 7.0 ± 3.3                  |
| Heat-shock protein hsp70        | Q4Q7Y4_LEIMA           | 72 kDa           | 84.0 ± 4.9               | 141.0 ± 18.0              | 114.0 ± 12.4               |
| Surface antigen protein         | Q4QGL8_LEIMA           | 65 kDa           | 11.0 ± 0.5               | 11.6 ± 1.9                | 17.3 ± 0.3                 |
| Calpain-like cysteine peptidase | Q4QCS8_LEIMA           | 91 kDa           | 4.0 ± 0.5                | 20.0 ± 8.2                | 9.0 ± 3.7                  |
| 14-3-3 protein                  | A4HUU6_LEIIN           | 29 kDa           | 4.3 ± 0.3                | 7.3 ± 3.1                 | 9.0 ± 2.6                  |

**Supplementary Table 4. Expression levels of proteins commonly used as EV markers of *Leishmania* spp.** The protein content of *Leishmania major*-derived EVs was catalogued by mass spectrometry (*L. major* database) using triplicates for each fraction ( $n=3$ ) and analyzed using Mascot followed by Scaffold Software. Numbers indicate the average peptide count ± the standard error to the mean (SEM). HSP83 and HSP70 were detected in all three EV fractions at similar levels of expression. GP63, Enolase, and Surface Antigen Protein levels increased in expression in smaller EVs, reaching

their highest level in the 100K fraction. EF-1, Tryparedoxin peroxidase, Calpain-like cysteine peptidase, and 14-3-3 protein did not significantly vary between the three EV groups.

| Protein Name                                                    | Accession # (UniProt) | Molecular Weight |
|-----------------------------------------------------------------|-----------------------|------------------|
| 2-methoxy-6-polyprenyl-1,4-benzoquinol methylase, mitochondrial | Q4Q0M6_LEIMA          | 32 kDa           |
| Putative 60S ribosomal protein L10a                             | Q4QDX9_LEIMA          | 25 kDa           |
| Uncharacterized protein                                         | Q95Z90_LEIMA          | 67 kDa           |
| Uncharacterized protein                                         | Q4Q867_LEIMA          | 81 kDa           |
| Uncharacterized protein                                         | Q4Q6S0_LEIMA          | 51 kDa           |
| Uncharacterized protein                                         | Q4Q157_LEIMA          | 97 kDa           |
| Uncharacterized protein                                         | E9ADV8_LEIMA          | 67 kDa           |
| Uncharacterized protein                                         | Q4Q3U0_LEIMA          | 43 kDa           |
| Uncharacterized protein                                         | Q4Q6F8_LEIMA          | 39 kDa           |
| Putative fumarate hydratase                                     | E9AWM1_LEIMU          | 61 kDa           |
| Uncharacterized protein                                         | A4I3M7_LEIIN          | 14 kDa           |
| Uncharacterized protein                                         | Q4Q9Q7_LEIMA          | 90 kDa           |
| Uncharacterized protein                                         | Q4Q7B3_LEIMA          | 590 kDa          |
| Uncharacterized protein                                         | Q4Q754_LEIMA          | 410 kDa          |
| Cation-transporting ATPase                                      | Q4QII2_LEIMA          | 139 kDa          |
| Uncharacterized protein                                         | Q4Q801_LEIMA          | 193 kDa          |
| Uncharacterized protein                                         | Q4Q2U2_LEIMA          | 477 kDa          |
| Polyadenylate-binding protein                                   | A0A088S1M1_9TRYP      | 62 kDa           |
| Aromatic amino acid hydroxylase-like                            | Q6WRI4_LEIMA          | 51 kDa           |
| Uncharacterized protein                                         | Q4QCT5_LEIMA          | 124 kDa          |
| Uncharacterized protein                                         | Q4Q0Y7_LEIMA          | 170 kDa          |
| Uncharacterized protein                                         | Q4QCC9_LEIMA          | 347 kDa          |
| Putative poly-zinc finger protein 2                             | Q4Q1R1_LEIMA          | 15 kDa           |
| Uncharacterized protein                                         | Q4Q353_LEIMA          | 38 kDa           |
| Putative chaperonin HSP60/CNP60                                 | Q4Q711_LEIMA          | 58 kDa           |
| Heat shock protein HslVU, ATPase subunit HslU, putative         | A0A088RNE1_9TRYP      | 48 kDa           |
| Uncharacterized protein                                         | Q4Q0C0_LEIMA          | 84 kDa           |
| Uncharacterized protein                                         | Q4Q0Q2_LEIMA          | 105 kDa          |
| Putative vacuolar ATP synthase catalytic subunit An             | A0A0N118L6_LEPSE      | 68 kDa           |
| Putative histone H3 variant                                     | Q4QDF8_LEIMA          | 16 kDa           |
| Uncharacterized protein                                         | Q4QJ60_LEIMA          | 62 kDa           |
| Uncharacterized protein                                         | Q4Q5Q8_LEIMA          | 140 kDa          |
| Putative mitochondrial RNA binding protein                      | Q4QB87_LEIMA          | 40 kDa           |



|                                                                     |                  |         |
|---------------------------------------------------------------------|------------------|---------|
| Putative heat shock protein-like protein                            | Q4Q584_LEIMA     | 36 kDa  |
| Uncharacterized protein                                             | Q4Q3W0_LEIMA     | 60 kDa  |
| Uncharacterized protein                                             | Q4Q483_LEIMA     | 28 kDa  |
| Hypothetical predicted multi-pass transmembrane protein             | Q4QAE6_LEIMA     | 44 kDa  |
| Putative pumilio protein 6                                          | Q4Q475_LEIMA     | 93 kDa  |
| Uncharacterized protein                                             | Q4Q0N7_LEIMA     | 388 kDa |
| Uncharacterized protein                                             | Q4Q0F7_LEIMA     | 261 kDa |
| Uncharacterized protein                                             | Q4QGM3_LEIMA     | 91 kDa  |
| Histone H3                                                          | H3_LEIIN         | 15 kDa  |
| Dynein intermediate-chain-like protein                              | Q4QAV3_LEIMA     | 75 kDa  |
| 3-hydroxy-3-methylglutaryl coenzyme A reductase                     | A4I602_LEIIN     | 46 kDa  |
| Uncharacterized protein                                             | Q4Q3D8_LEIMA     | 358 kDa |
| Uncharacterized protein                                             | Q4QHG5_LEIMA     | 707 kDa |
| Uncharacterized protein                                             | Q4QIW6_LEIMA     | 33 kDa  |
| Putative serine/threonine-protein kinase                            | Q4Q6T0_LEIMA     | 85 kDa  |
| Uncharacterized protein                                             | Q4QBA6_LEIMA     | 116 kDa |
| 3-methylcrotonoyl-CoA carboxylase beta subunit, putative            | E9BAP8_LEIDB     | 58 kDa  |
| Uncharacterized protein                                             | Q4Q9Z4_LEIMA     | 84 kDa  |
| Uncharacterized protein                                             | Q4Q0J5_LEIMA     | 78 kDa  |
| Uncharacterized protein                                             | Q4QG62_LEIMA     | 162 kDa |
| Uncharacterized protein                                             | Q4QH73_LEIMA     | 148 kDa |
| Putative 2-oxoisovalerate dehydrogenase beta subunit, mitochondrial | E9AEI2_LEIMA     | 40 kDa  |
| Uncharacterized protein                                             | Q4QEJ9_LEIMA     | 493 kDa |
| Putative electron-transfer-flavoprotein, alpha polypeptide          | Q4Q8F2_LEIMA     | 34 kDa  |
| Uncharacterized protein                                             | E9ADA0_LEIMA     | 46 kDa  |
| ADP/ATP mitochondrial carrier-like protein                          | Q4QFN6_LEIMA     | 41 kDa  |
| Histone H2B                                                         | E9AR94_LEIMU     | 12 kDa  |
| Uncharacterized protein                                             | Q4QBQ7_LEIMA     | 101 kDa |
| Putative ATP-binding cassette protein subfamily C, member 2         | Q4QBF3_LEIMA     | 174 kDa |
| LETM1 and EF-hand domain-containing protein 1, putative             | A0A088SE62_9TRYP | 57 kDa  |
| Poly(A)-binding protein 3                                           | Q4QA88_LEIMA     | 61 kDa  |
| Uncharacterized protein                                             | Q4Q3G7_LEIMA     | 47 kDa  |
| Putative kinesin K39                                                | Q4QFM2_LEIMA     | 341 kDa |
| Uncharacterized protein                                             | Q4Q360_LEIMA     | 30 kDa  |
| Beta-tubulin                                                        | A4HLD6_LEIBR     | 21 kDa  |

|                         |              |         |
|-------------------------|--------------|---------|
| Uncharacterized protein | A4I7H7_LEIIN | 112 kDa |
| Uncharacterized protein | Q4QIP4_LEIMA | 539 kDa |

**Supplementary Table 5. Unique proteins identified in the 2K fraction of *Leishmania major* extracellular vesicles.** The protein content of *Leishmania major*-derived EVs was catalogued by mass spectrometry (*L. major* database) using triplicates for each fraction ( $n=3$ ) and analyzed using Mascot followed by Scaffold Software. Unique proteins detected by LC-MS/MS in each fraction were determined using inclusion criteria of a minimum of 2 detected peptides, a peptide threshold of 80%, and a protein identity of 95%, and excluded if they represented a true hit in more than one group. 70 proteins were identified as unique to the 2K fraction.

| <b>Protein Name</b>                                        | <b>Accession # (UniProt)</b> | <b>Molecular Weight</b> |
|------------------------------------------------------------|------------------------------|-------------------------|
| Uncharacterized protein                                    | Q4QBP4_LEIMA                 | 129 kDa                 |
| Putative glucosamine-fructose-6-phosphate aminotransferase | Q4QIY2_LEIMA                 | 73 kDa                  |
| Uncharacterized protein                                    | Q4QEJ8_LEIMA                 | 88 kDa                  |
| Acetylornithine deacetylase-like protein                   | Q4QIR7_LEIMA                 | 43 kDa                  |
| Uncharacterized protein                                    | A4HK11_LEIBR                 | 181 kDa                 |
| Uncharacterized protein                                    | Q4Q1S2_LEIMA                 | 98 kDa                  |
| Arginase                                                   | A0A145YEM0_LEIMA             | 36 kDa                  |
| Putative 40S ribosomal protein S10                         | Q4Q1X7_LEIMA                 | 19 kDa                  |
| Eukaryotic translation initiation factor 3 subunit I       | Q4Q127_LEIMA                 | 45 kDa                  |
| Putative cytochrome-b5 reductase                           | A4I862_LEIIN                 | 37 kDa                  |
| 60s ribosomal protein L30                                  | A0A0N1PD37_LEPSE             | 11 kDa                  |
| Putative cAMP-specific phosphodiesterase                   | Q95Z92_LEIMA                 | 79 kDa                  |
| Ubiquitin-conjugating enzyme-like protein                  | E9BBK6_LEIDB                 | 16 kDa                  |
| Putative phosphomevalonate kinase protein                  | Q4QF34_LEIMA                 | 49 kDa                  |
| Putative glutaminyl-tRNA synthetase                        | Q4QF36_LEIMA                 | 66 kDa                  |
| Cytochrome c oxidase subunit I                             | A4ICE1_LEIIN                 | 14 kDa                  |
| Translation initiation factor-like protein                 | A0A088S320_9TRYP             | 38 kDa                  |
| Uncharacterized protein                                    | Q4Q279_LEIMA                 | 89 kDa                  |
| Uncharacterized protein                                    | Q4QA76_LEIMA                 | 151 kDa                 |
| Uncharacterized protein                                    | Q4Q3P1_LEIMA                 | 69 kDa                  |
| Uncharacterized protein                                    | E9B3A4_LEIMU                 | 24 kDa                  |
| Uncharacterized protein                                    | Q4Q1J4_LEIMA                 | 50 kDa                  |
| Phosphodiesterase                                          | Q6S998_LEIMA                 | 71 kDa                  |
| Putative ubiquitin carboxy-terminal hydrolase              | Q9U1E5_LEIMA                 | 148 kDa                 |
| Putative intraflagellar transport protein IFT88            | E9AD91_LEIMA                 | 91 kDa                  |
| Uncharacterized protein                                    | Q4QEE6_LEIMA                 | 60 kDa                  |
| Uncharacterized protein                                    | Q4QF65_LEIMA                 | 138 kDa                 |
| Uncharacterized protein                                    | A4HUJ0_LEIIN                 | 46 kDa                  |
| Uncharacterized protein                                    | Q4Q201_LEIMA                 | 138 kDa                 |
| Putative ubiquitin-protein ligase                          | Q4Q0C6_LEIMA                 | 455 kDa                 |
| Putative proteasome regulatory non-ATP-ase subunit 2       | Q4Q893_LEIMA                 | 106 kDa                 |
| Acidocalcisomal pyrophosphatase                            | Q4QH59_LEIMA                 | 51 kDa                  |
| Uncharacterized protein                                    | Q4QE99_LEIMA                 | 55 kDa                  |
| Putative calpain-like cysteine peptidase                   | A4HS39_LEIIN                 | 95 kDa                  |

|                           |              |         |
|---------------------------|--------------|---------|
| Uncharacterized protein   | E9AF11_LEIMA | 133 kDa |
| Putative casein kinase II | A4IB73_LEIIN | 43 kDa  |

**Supplementary Table 6. Unique proteins identified in the 10K fraction of *Leishmania major* extracellular vesicles.** The protein content of *Leishmania major*-derived EVs was catalogued by mass spectrometry (*L. major* database) using triplicates for each fraction ( $n=3$ ) and analyzed using Mascot followed by Scaffold Software. Unique proteins detected by LC-MS/MS in each fraction were determined using inclusion criteria of a minimum of 2 detected peptides, a peptide threshold of 80%, and a protein identity of 95%, and excluded if they represented a true hit in more than one group. 36 proteins were identified as unique to the 10K fraction.

| <b>Protein Name</b>                                         | <b>Accession # (UniProt)</b> | <b>Molecular Weight</b> |
|-------------------------------------------------------------|------------------------------|-------------------------|
| Putative calcium motive p-type ATPase                       | E9AF31_LEIMA                 | 122 kDa                 |
| Uncharacterized protein / <i>IST1</i>                       | Q4Q9F3_LEIMA                 | 30 kDa                  |
| Qc-SNARE protein                                            | Q4QIG6_LEIMA                 | 24 kDa                  |
| SNF7                                                        | E9AFR7_LEIMA                 | 24 kDa                  |
| Succinyl-diaminopimelate desuccinylase-like protein         | A4I6X9_LEIIN                 | 51 kDa                  |
| Uncharacterized protein                                     | Q4QH03_LEIMA                 | 22 kDa                  |
| Protein tyrosine phosphatase-like protein / <i>PRL1</i>     | Q4QEZ7_LEIMA                 | 19 kDa                  |
| Nucleobase transporter                                      | Q4QG33_LEIMA                 | 55 kDa                  |
| Putative ATP-binding cassette protein subfamily A, member 8 | E9AD74_LEIMA                 | 202 kDa                 |
| SNF-7-like protein                                          | E9AEN3_LEIMA                 | 26 kDa                  |
| VTA1                                                        | Q4QJC8_LEIMA                 | 39 kDa                  |
| Uncharacterized protein / <i>CHMP2B</i>                     | Q4QB64_LEIMA                 | 81 kDa                  |
| Uncharacterized protein / <i>DNA Pol III</i>                | Q4QH65_LEIMA                 | 94 kDa                  |
| Uncharacterized protein                                     | Q4QB65_LEIMA                 | 38 kDa                  |
| Sucrose-phosphate synthase-like protein                     | Q4QES5_LEIMA                 | 52 kDa                  |
| Uncharacterized protein / <i>ALIX</i>                       | E9ADE3_LEIMA                 | 102 kDa                 |
| Uncharacterized protein                                     | Q4Q276_LEIMA                 | 17 kDa                  |
| Uncharacterized protein                                     | Q9N852_LEIMA                 | 54 kDa                  |
| VPS37                                                       | Q4Q8L4_LEIMA                 | 32 kDa                  |
| Putative serine/threonine protein phosphatase type 5        | Q4QE27_LEIMA                 | 53 kDa                  |
| Uncharacterized protein                                     | Q4Q6I3_LEIMA                 | 65 kDa                  |
| Putative 2,4-dihydroxyhept-2-ene-1,7-dioic acid aldolase    | Q4Q9N8_LEIMA                 | 30 kDa                  |
| Phosphodiesterase                                           | E9AEA6_LEIMA                 | 81 kDa                  |
| Putative valyl-tRNA synthetase                              | Q4Q6X7_LEIMA                 | 110 kDa                 |
| Uncharacterized protein / <i>LRR-RI</i>                     | Q4QAY9_LEIMA                 | 33 kDa                  |
| Putative phosphatase 2C                                     | A4I565_LEIIN                 | 42 kDa                  |
| Glucose transporter, <i>Imgt3</i>                           | Q4Q0D2_LEIMA                 | 62 kDa                  |
| Putative amino acid transporter aATP11                      | Q4Q6M9_LEIMA                 | 52 kDa                  |
| Putative folate/biopterin transporter                       | Q4QHI0_LEIMA                 | 75 kDa                  |
| Formate--tetrahydrofolate ligase                            | A4I5T5_LEIIN                 | 67 kDa                  |
| Uncharacterized protein / <i>AMMECR1</i>                    | Q4Q5M0_LEIMA                 | 21 kDa                  |
| Putative folate/biopterin transporter                       | Q4QHI2_LEIMA                 | 73 kDa                  |

**Supplementary Table 7. Unique proteins identified in the 100K fraction of *Leishmania major* extracellular vesicles.** The protein content of *Leishmania major*-derived EVs was catalogued by mass spectrometry (*L. major* database) using triplicates for each fraction ( $n=3$ ) and analyzed using Mascot followed by Scaffold Software. Unique proteins detected by LC-MS/MS in each fraction were determined using inclusion criteria of a minimum of 2 detected peptides, a peptide threshold of 80%, and a protein identity of 95%, and excluded if they represented a true hit in more than one group. 32 proteins were identified as unique to the 100K fraction. Homologous protein names were manually searched using UniProt for uncharacterized proteins and have been indicated in italics when possible.
